# Supplementary material
Source: MDPI journal article supplement (https://www.mdpi.com/2073-4352/11/9/1124)
Supplement: s1 [file s1]

## Supplementary materials

# Hydroxyapatite and Silicon-Modified Hydroxyapatite as Drug Carriers for 4-Aminopyridine

Laura Marincas<sup>1</sup>, Graziella Liana Turdean<sup>1</sup>, Monica Toşa<sup>3</sup>, Zsolt Kovács<sup>4</sup>, Béla Kovács<sup>4</sup>, Réka Barabás<sup>5,\*</sup>, Noémi-Izabella Farkas<sup>2,\*</sup> and Liliana Bizo<sup>2</sup>

- <sup>1</sup> Department of Chemistry, Faculty of Chemistry and Chemical Engineering, Babeş-Bolyai University, 11 Arany János Street, RO-400028 Cluj-Napoca, Romania; laura.marincas@ubbcluj.ro
  - <sup>2</sup> Department of Chemical Engineering, Faculty of Chemistry and Chemical Engineering, Babeş-Bolyai University, 11 Arany János Street, RO-400028 Cluj-Napoca, Romania; graziella.turdean@ubbcluj.ro (G.L.T.); liliana.bizo@ubbcluj.ro (L.B.)
  - <sup>3</sup> Enzymology and Applied Biocatalysis Research Centre, Faculty of Chemistry and Chemical Engineering, Babeş-Bolyai University, 11 Arany János Street, RO-400028 Cluj-Napoca, Romania; monica.tosa@ubbcluj.ro
  - <sup>4</sup> Department of Biochemistry and Environmental Chemistry, Faculty of Pharmacy, George Emil Palade University of Medicine, Pharmacy, Science, and Technology of Târgu Mureş, Gheorghe Marinescu 38 Street, RO-540142, Târgu Mureş, Romania; zsolt.kovacs@umfst.ro (Z.K.); bela.kovacs@umfst.ro (B.K.)
  - <sup>5</sup> Department of Chemistry and Chemical Engineering of Hungarian Line of Study, Faculty of Chemistry and Chemical Engineering, Babeş-Bolyai University, 11 Arany János Street, RO-400028, Cluj-Napoca, Romania
- \* Correspondence: reka.barabas@ubbcluj.ro (R.B.); noemi.farkas@ubbcluj.ro (N.-I.F.)

**Citation:** Marincas, L.; Turdean, G.L.; To, M.; Kovács, Z.; Kovács, B.; Barabás, R.; Farkas, N.-I.; Bizo, L. Hydroxyapatite and Silicon-Modified Hydroxyapatite as Drug Carriers for 4-Aminopyridine. *Crystals* **2021**, *11*, 1124. <https://doi.org/10.3390/cryst11091124>

Academic Editor: Witold Łojkowski

Received: 8 August 2021

Accepted: 11 September 2021

Published: 15 September 2021

**Publisher's Note:** MDPI stays neutral with regard to jurisdictional claims in published maps and institutional affiliations.

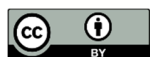

**Copyright:** © 2021 by the authors. Submitted for possible open access publication under the terms and conditions of the Creative Commons Attribution (CC BY) license (<http://creativecommons.org/licenses/by/4.0/>).

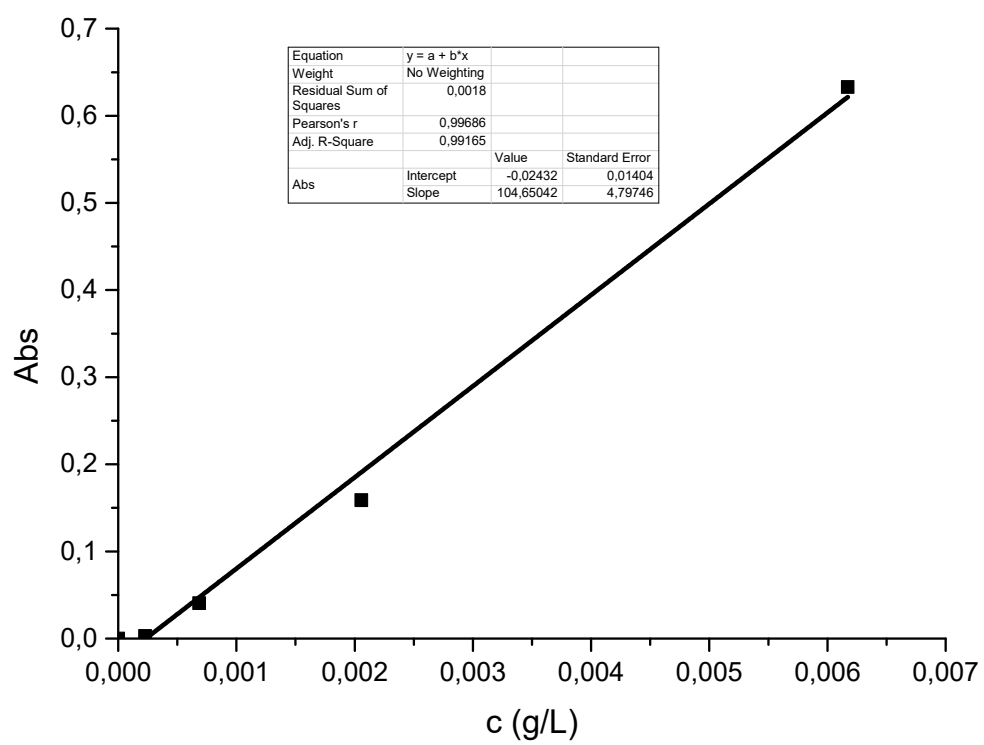

**Figure S1.** The calibration curve.

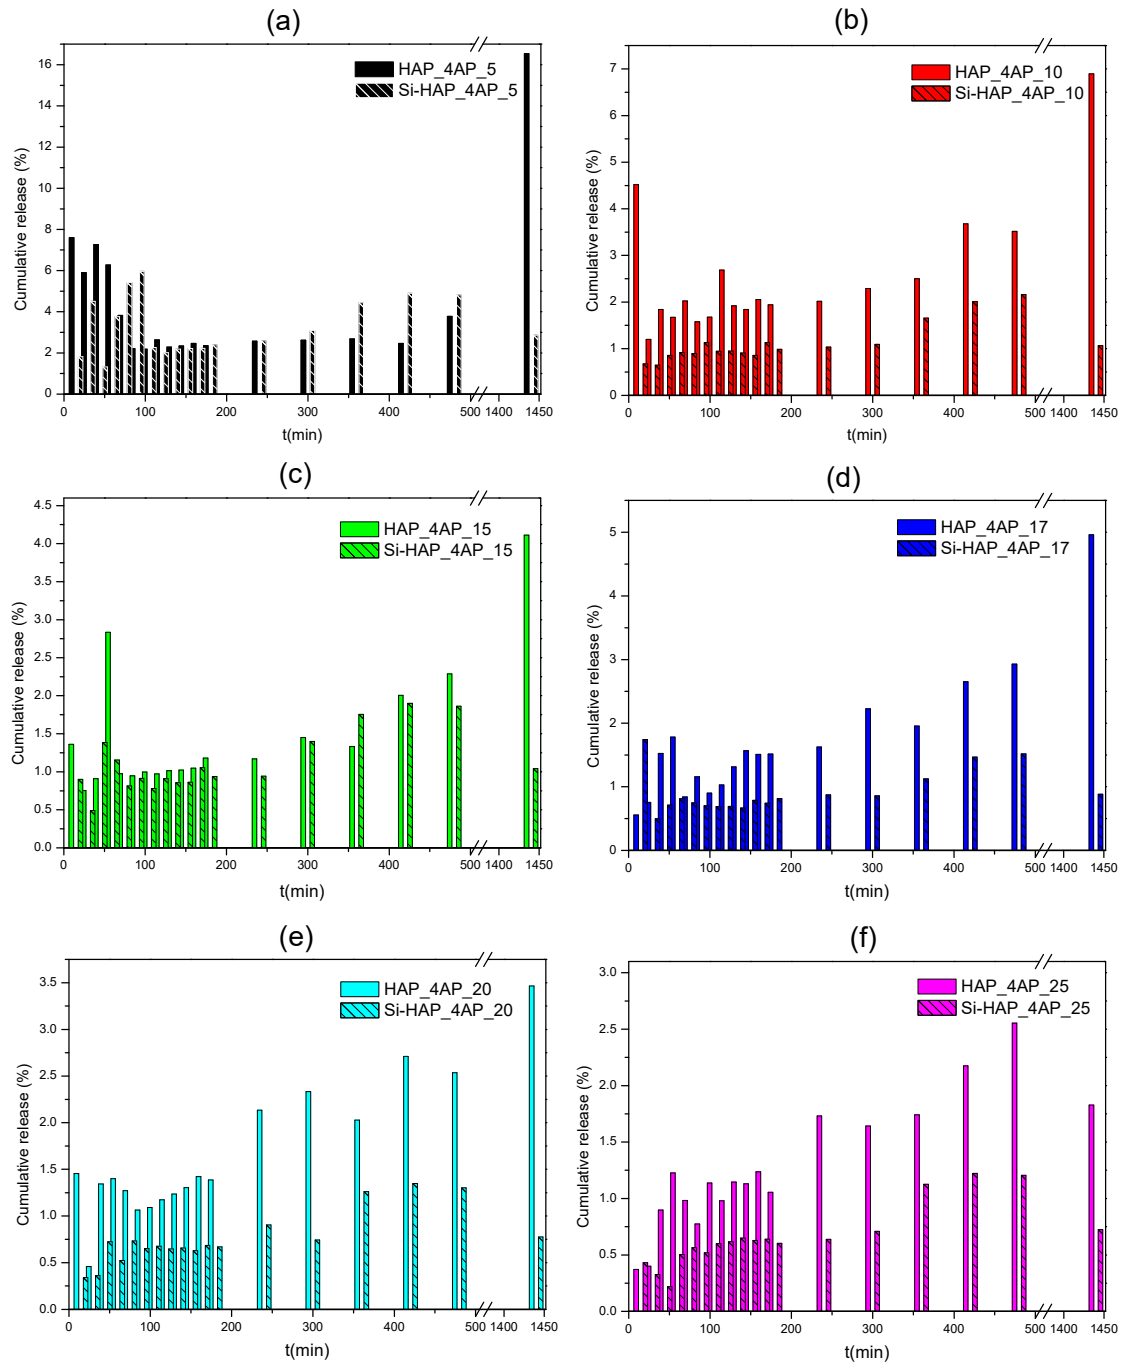

**Figure S2.** Cumulative release profile of 4AP from (a) HAP\_4AP\_5 and Si-HAP\_4AP\_5, (b) HAP\_4AP\_10 and Si-HAP\_4AP\_10, (c) HAP\_4AP\_15 and Si-HAP\_4AP\_15, (d) HAP\_4AP\_17 and Si-HAP\_4AP\_17, (e) HAP\_4AP\_20 and Si-HAP\_4AP\_20, and (f) HAP\_4AP\_25 and Si-HAP\_4AP\_25 carriers, respectively.

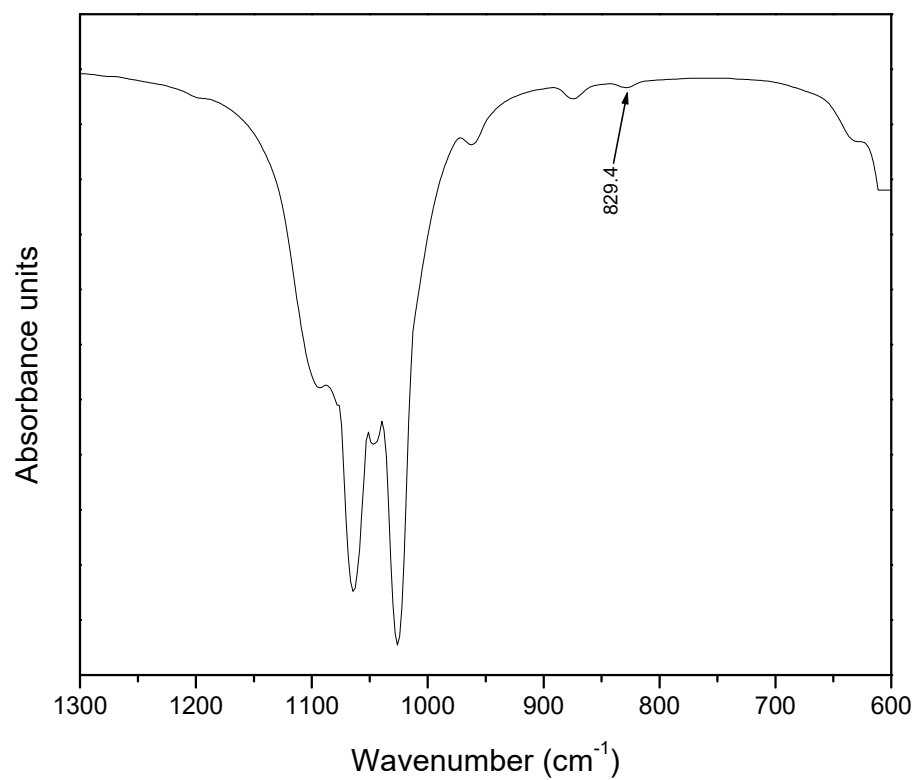

**Figure S3.** FTIR spectrum of Si-HAP\_4AP\_25 sample.
